# Supplementary material for: Novel nanocomplexes of hyperbranched poly(ethyleneimine), sodium dodecyl sulfate and dodecyl maltoside
Source: Royal Society of Chemistry journal article supplement (doi:10.1039/b715754a), 2008-01-01
Supplement: b715754a.pdf [file b715754a.pdf]

**Additional graphs for the interpretation of the saturation of the effect of dodecyl maltoside on the kinetically stable ranges of the PEI/SDS/C<sub>12</sub>G<sub>2</sub> complexes**

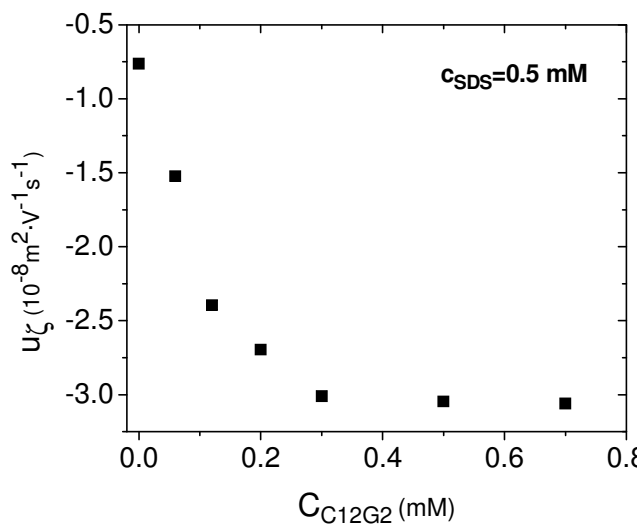

**S1.** Electrophoretic mobility of the complexes against the concentration of C<sub>12</sub>G<sub>2</sub> in 0.5 mM SDS (from the data of Figure 3 as well as from additional measurements). pH<sup>in</sup>=6, c<sub>PEI</sub>=20 ppm.

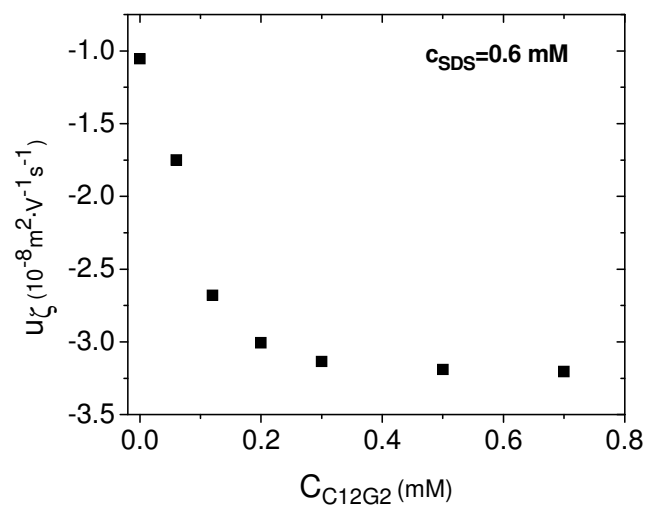

**S2.** Electrophoretic mobility of the complexes against the concentration of  $\text{C}_{12}\text{G}_2$  in 0.6 mM SDS (from the data of Figure 3 as well as from additional measurements).  $\text{pH}^{\text{in}}=6$ ,  $c_{\text{PEI}}=20 \text{ ppm}$ .

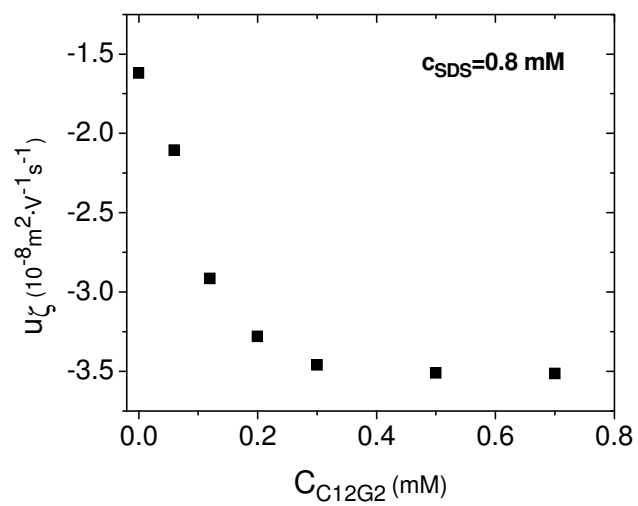

**S3.** Electrophoretic mobility of the complexes against the concentration of  $\text{C}_{12}\text{G}_2$  in 0.8 mM SDS (from the data of Figure 3 as well as from additional measurements).  $\text{pH}^{\text{in}}=6$ ,  $c_{\text{PEI}}=20$  ppm.

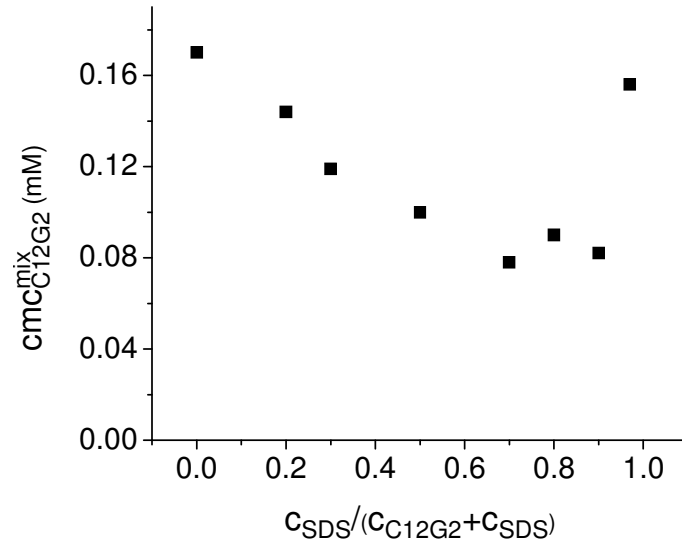

**S4.** The contribution of  $C_{12}G_2$  ( $cmc_{C_{12}G_2}^{mix}$ ) to the mixed cmc of SDS/  $C_{12}G_2$  mixtures ( $cmc^{mix}$ ) against the SDS to  $C_{12}G_2$  molar ratio ( $cmc^{mix} = cmc_{C_{12}G_2}^{mix} + cmc_{SDS}^{mix}$  and the values of  $cmc_{C_{12}G_2}^{mix}$  was derived from the  $cmc^{mix}$  data of reference 44).
